# Supplementary material for: Pharmacological Mechanism of NRICM101 for COVID-19 Treatments by Combined Network Pharmacology and Pharmacodynamics
Source: MDPI journal article supplement (doi:10.3390/ijms232315385), 2022-12-06
Supplement: s1 [file s1]

**Table S11.** Fitted coefficients (mean  $\pm$  S.E.) of the three-parameter Hill model describing IL-6 or TNF- $\alpha$  expressions in murine alveolar macrophages treated with different dilution folds of the NRICM101 based on the experimental data adapted from [10].

|                   | IL-6              | TNF- $\alpha$    |
|-------------------|-------------------|------------------|
| $E_{\max}$ (%)    | 91.61 $\pm$ 4.31  | 93.58 $\pm$ 2.69 |
| $EC_{50}$ (folds) | 93.31 $\pm$ 17.91 | 39.71 $\pm$ 4.13 |
| $n$               | 1.00 $\pm$ 0.16   | 1.83 $\pm$ 0.30  |
| $r^2$             | 0.98              | 0.98             |
| $p$ -value        | ***               | ***              |

\*\*\*  $p < 0.001$ .

## Reference

10. Tsai, K.-C.; Huang, Y.-C.; Liaw, C.-C.; Tsai, C.-I.; Chiou, C.-T.; Lin, C.-J.; Wei, W.-C.; Lin, S. J.-S.; Tseng, Y.-H.; Yeh, K.-M.; Lin, Y.-L.; Jan, J.-T.; Liang, J.-J.; Liao, C.-C.; Chiou, W.-F.; Kuo, Y.-H.; Lee, S.-M.; Lee, M.-Y.; Su, Y.-C., A traditional Chinese medicine formula NRICM101 to target COVID-19 through multiple pathways: A bedside-to-bench study. *Biomedicine & Pharmacotherapy* **2021**, *133*, 111037.
